# Supplementary material for: Multiparametric domain insertional profiling of adeno-associated virus VP1
Source: PubMed Central journal article supplement — Mol Ther Methods Clin Dev. 2023 Oct 26;31:101143. doi: 10.1016/j.omtm.2023.101143 (PMC10661864; doi:10.1016/j.omtm.2023.101143), 2023-10-26
Supplement: mmc1.pdf [file mmc1.pdf]

**OMTM, Volume 31**

**Supplemental information**

**Multiparametric domain insertional profiling  
of adeno-associated virus VP1**

**Mareike D. Hoffmann, Alina C. Zdechlik, Yungui He, David Nedrud, George Aslanidi, Wendy Gordon, and Daniel Schmidt**

## Note S1: Linking clusters to AAV function

Using existing AAV structure / function relationships knowledge, we can begin to make association between each of the five identified clusters and their specific roles in AAV packaging and infection:

1. The strong association between poor pulldown fitness, uptake fitness, and cluster 1 is obvious considering it being comprised of mostly buried or internal residues and containing VP1u, which encodes the required PLA2 domain and nuclear localization signals.<sup>1-4</sup> Conversely, association with higher packaging fitness would be compatible with motif insertion promoting externalization of VP1u, thus decreasing steric hindrance with the packaged genome.
2. The sensitivity of cluster 3 with respect to packaging efficiency is consistent with trimer formation and stability, which are key determinants of capsid assembly.<sup>5,6</sup> Most binding sites for cellular receptors (e.g., proteoglycan, AAVR) are located near the 3-fold axis, as well.<sup>7-13</sup> Flexibility of the 2-fold interface has previously been linked not only to AAV infectivity<sup>14</sup>, but also genome packaging<sup>15</sup>, which would explain how insertions may drive poor packaging fitness.
3. The relatively neutral fitness of cluster 2 (e.g., packaging, uptake) is consistent with most insertions ending up on the capsid interior, not interfering with assembly or cellular uptake. While the 5-fold pore is part of this cluster, a numeric simulation of VP1 copy numbers ranging from 1-10 suggests that around half of the twelve 5-fold pores are assembled from non-VP1 only, and thus available as an alternative pathway for Rep-mediated genome packaging.
4. Cluster 5 has an intricate structure, with the HI loops that surround the 5-fold pore like the blades of an aperture and connecting to the base of the 3-fold axis. Prior studies that have suggested a link between conformational changes at the 3-fold protrusion upon binding cell surface proteoglycan are communicated to conformational change at the 5-fold pore, priming the release of VP1u.<sup>16</sup>

## Note S2: Effects of cysteine mutants

Several of the cysteine pairs we hand-picked involve interfaces that undergo conformational dynamics during infection:

1. Mutating F671C in the HI loop was strongly deleterious to infection, but this phenotype was rescued in the background of H255C, which by itself was benign. Prior studies have shown that heparin binding near the 3-fold and 2-fold axes induces an HI loop re-arrangement and an iris-like opening of the channel located at the 5-fold axis.<sup>16</sup> HI loop deletions, substitutions, and insertions have shown that this loop, while flexible in amino acid composition and length, is critical for proper VP1 incorporation and infectivity<sup>17</sup>. The same study showed that interaction of the HI loop with the underlying EF loop is mediated by hydrophobic pi-stacking interactions (F661/P373; in AAV2 numbering) and that disrupting this interaction lowers infectivity by preventing VP1 incorporating into assembled capsid. Our results are reminiscent of this mechanism.
2. Positions F671/H255, which can form NH $\cdots\pi$  hydrogen bonds, are both conserved across AAV serotypes. H255C may be benign as this supports formation of an aromatic-thiol  $\pi$  hydrogen bond, thus allowing VP1 to incorporate or retaining structural rearrangement after receptor binding. Conversely, F671C is disruptive as it removes the aromatic component of  $\pi$ -stacking interactions, prevents VP1 incorporation and/or disrupts these rearrangements. The H255C/F671C double mutant may rescue infectivity by forming a disulfide bond to substitute as a stand in for  $\pi$  interactions.
3. H423C (at the base of the 3-fold axis) and V613C (with the 2-fold interface) individually had little effect, but together strongly impaired infectivity. This trend held true for adjacent pairs (H360C/437C; H428CL737C) that similar linked clusters comprising the 3-fold protrusion and 2-fold axis. Interestingly, several prior studies have linked AAV infectivity and conformational dynamics at the 3-fold and 2-fold axes. In addition to structural rearrangements in the HI loops, heparin binding to AAV2 causes significant rearrangement of 3-fold protrusions and the 2-fold valleys.<sup>16</sup> Selective oxidation of tyrosine residue at the 2-fold dimer interface lowered infectivity.<sup>14</sup> A mutation (R432A in AAV2) remodeled intramolecular and intermolecular hydrogen bond networks propagating from the 3-fold to both 2-fold and 5-fold axes.<sup>18, 19</sup>

We would like to note here that more factors than an oxidizing environment play a role in the formation of disulfide bonds, including the structure of the protein, but also the surrounding amino acids and the pH value. Furthermore, post-translational modifications other than disulfide bonds can also occur in an oxidizing environment, the effects of which cannot be distinguished from those of disulfide bonds in our experimental approach.

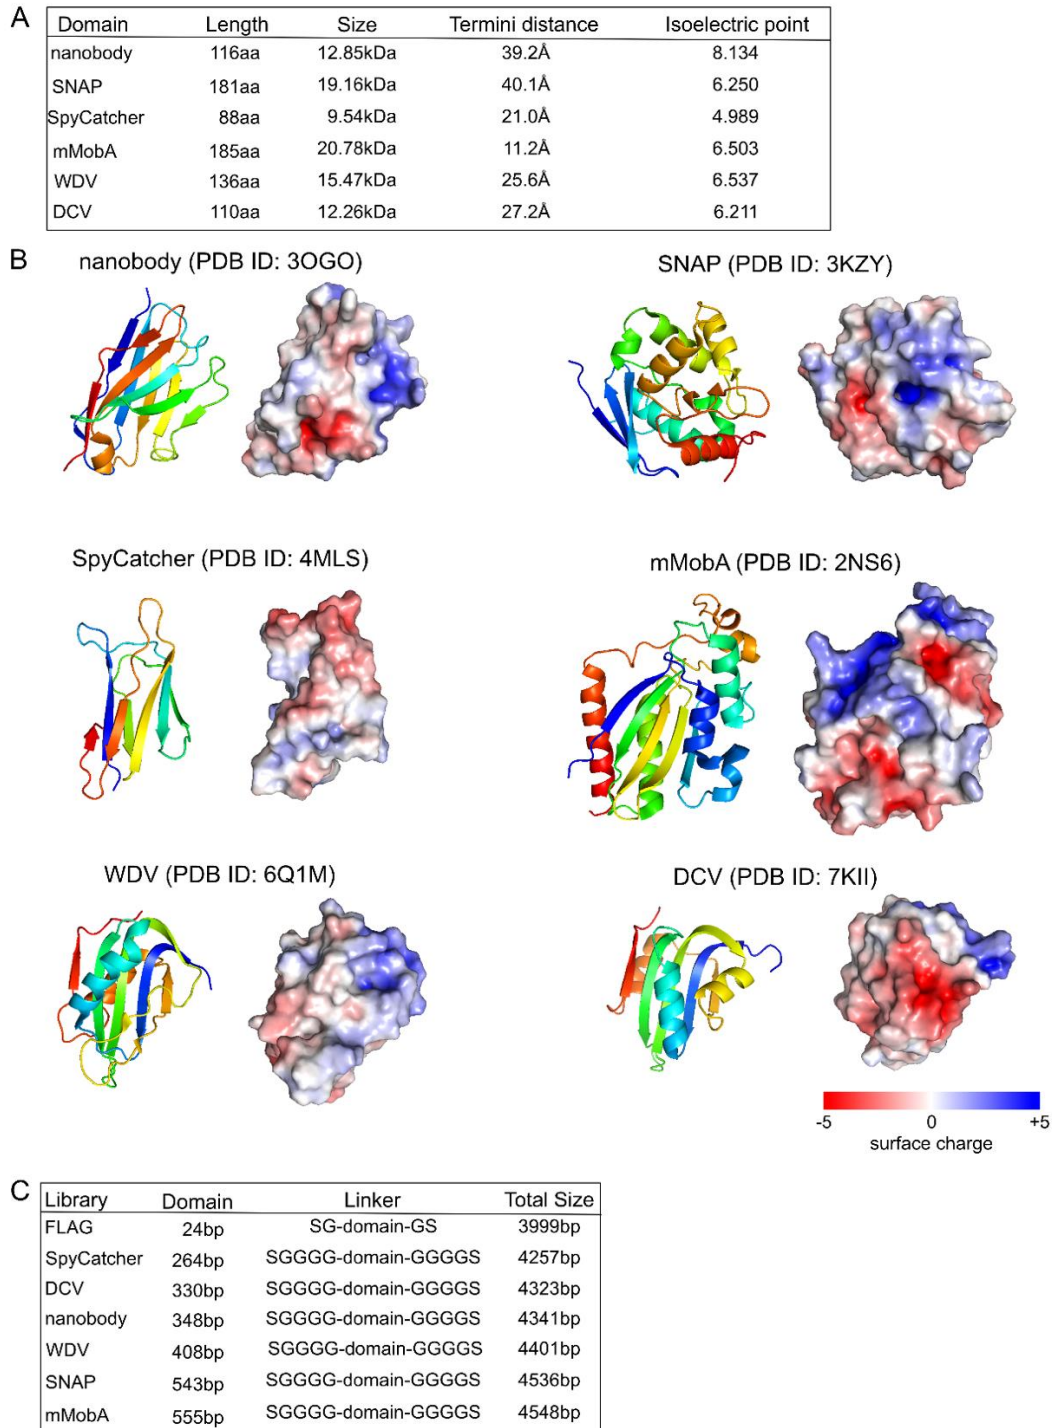

**Figure S1**

Properties of inserted domains and sizes of library payloads. (A) Physical descriptions of domains used in this study. (B) Cartoon representation of domain structures (left) and surface representation with net surface charge shown as a gradient from red (negative), over white (neutral), to blue (positive). (C) Sizes of library payloads.

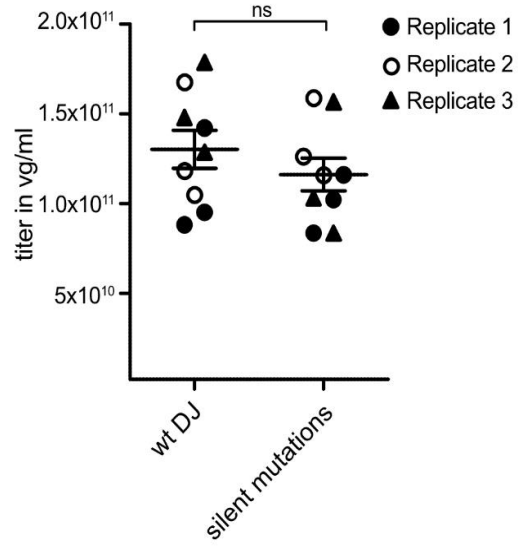

**Figure S2**

Packaging fitness of silent mutation variant compared to AAV-DJ. Crude lysate packaging titers quantified via qPCR. Three replicates with three technical replicates each were performed. Data are means  $\pm$  SEM. No statistical significance (ns) between AAV-DJ and the silent mutations variant by an unpaired, two-sided Student's t-test (p-value: 0.3327).

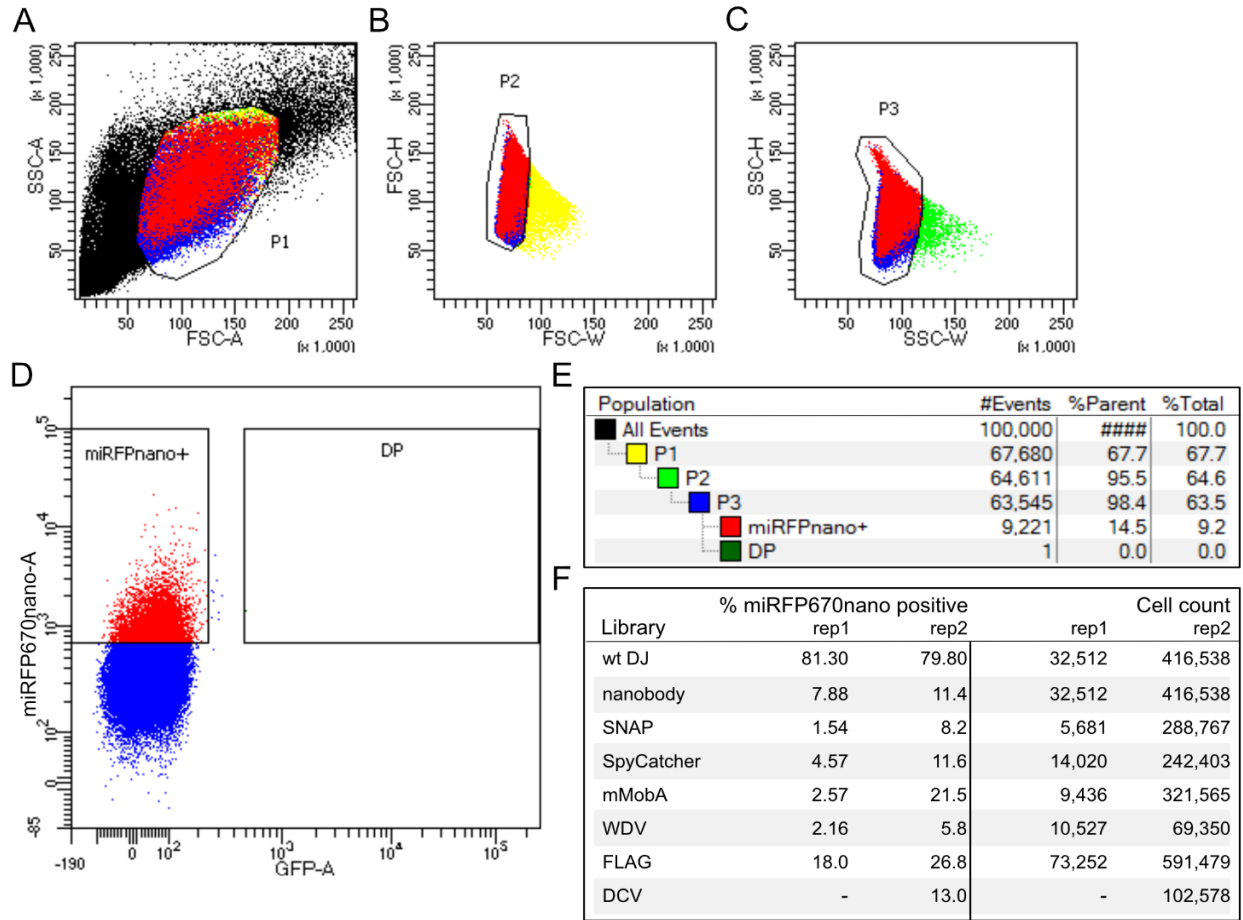

**Figure S3**

Infection fitness assay gating scheme. (A) Whole HEK293FT cells are gated on side (SSC-A) and forward scattering (FSC-A). (B-C) Forward scattering height (FSC-H), forward scattering width (FSC-W), and side scattering width (SSC-W) are used to gate single cells. (D) Cells are further gated using miRFP670nano as an infection marker (representative example). (E-F) Sort statistic for each gated cell population.

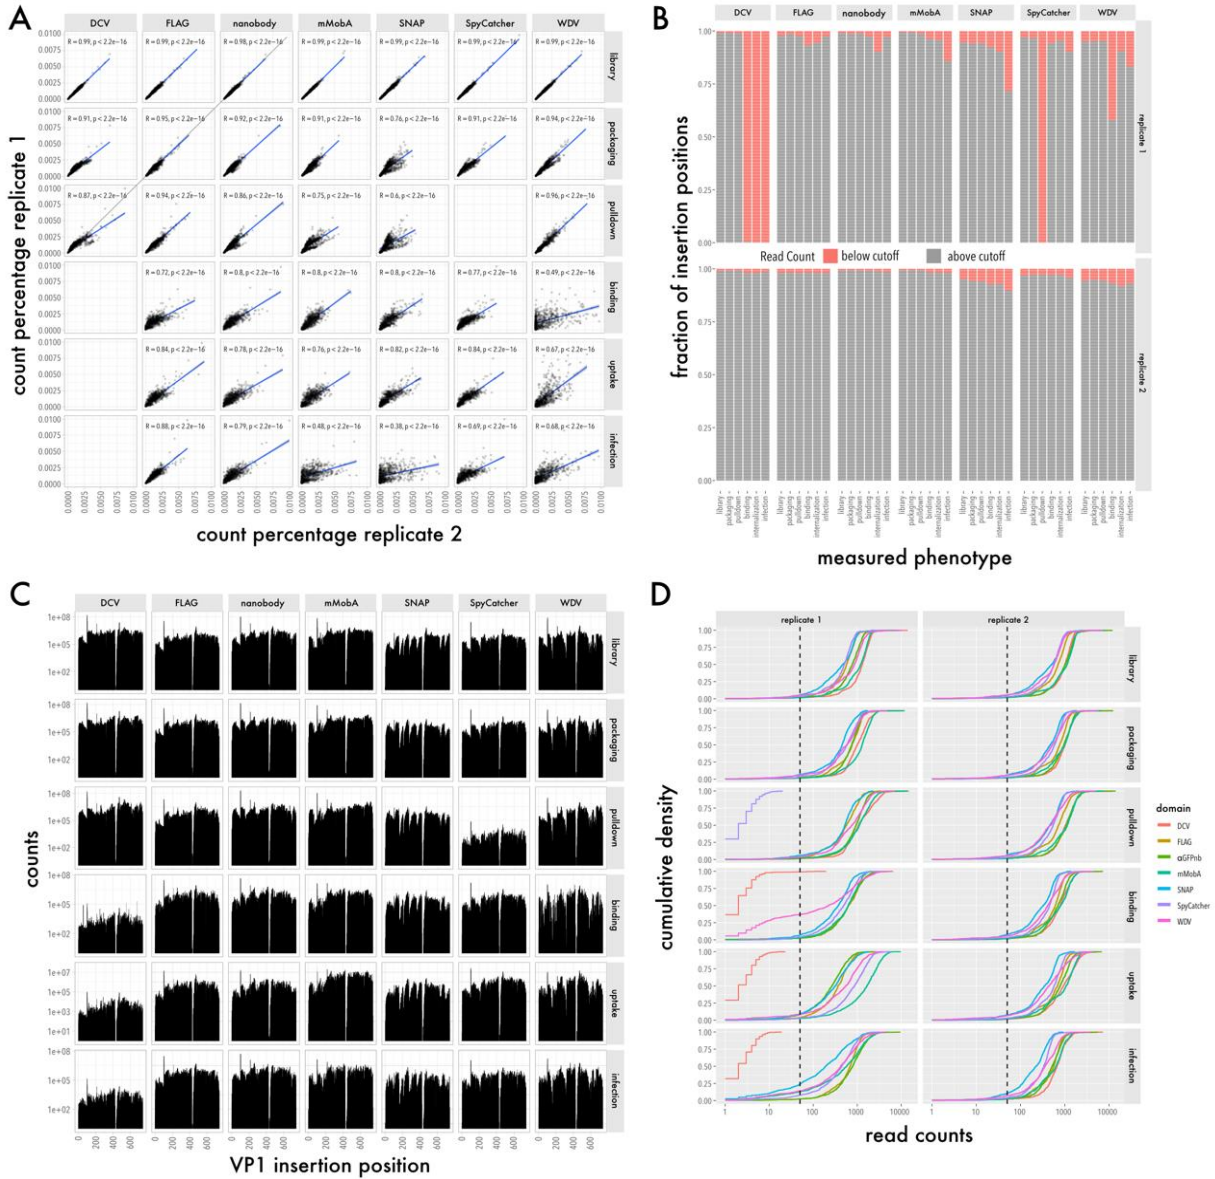

**Figure S4**

Fitness assay biological replicates, data completeness, and depth. (A) Read counts of replicate 1 are plotted against read counts of replicate 2 for the plasmid library, packaging, pulldown, binding, uptake, and infection assays. Data for all seven inserted domains are shown. Linear correlation was calculated (blue line). Pearson correlation coefficient and p values are shown. (B) Contingency plots showing the fraction of insertion positions below (red) and above (grey) the read count quantity cut-off of 50 reads for all seven domains and measured phenotypes. Data are shown for replicate 1 (top) and replicate 2 (bottom). (C) Total read counts of the plasmid library, packaging, pulldown, binding, uptake, and infection assays for each position are represented by insertion position. Data for all seven inserted domains are shown. (D) Cumulative density plots showing the read counts of the plasmid library, packaging, pulldown, binding, uptake, and infection assays for all seven inserted domains for replicate 1 and replicate 2. Cut off for sufficient read quantity was set to 50 reads and is represented by the black dashed lines.

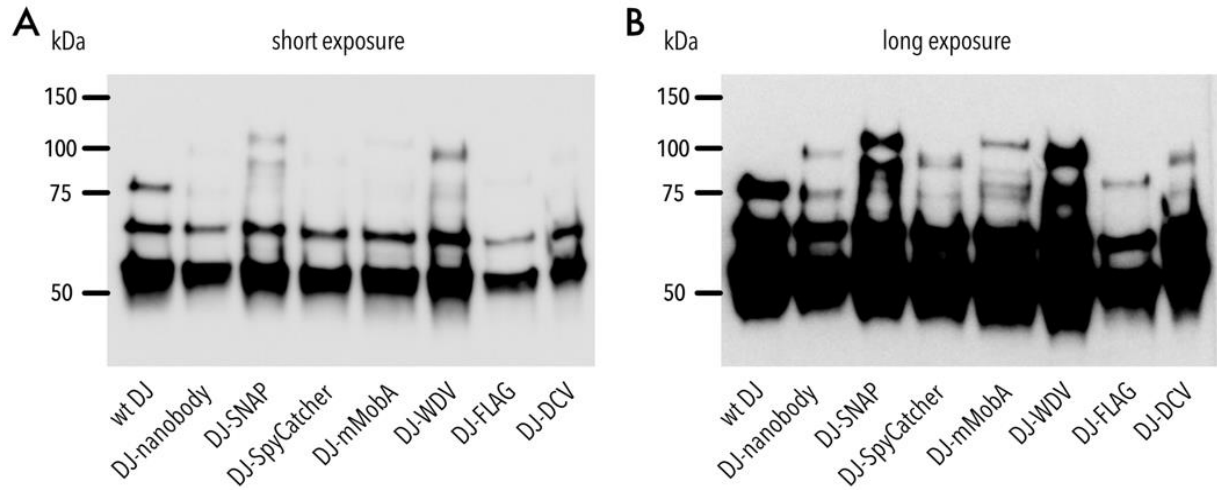

**Figure S5**

Western blot of AAV domain insertion libraries. (A-B) Representative Western blot image of AAV domain insertion libraries stained with B1 antibody (detecting VP1, VP2 and VP3 subunits) at a short exposure time (A) and long exposure time (B).



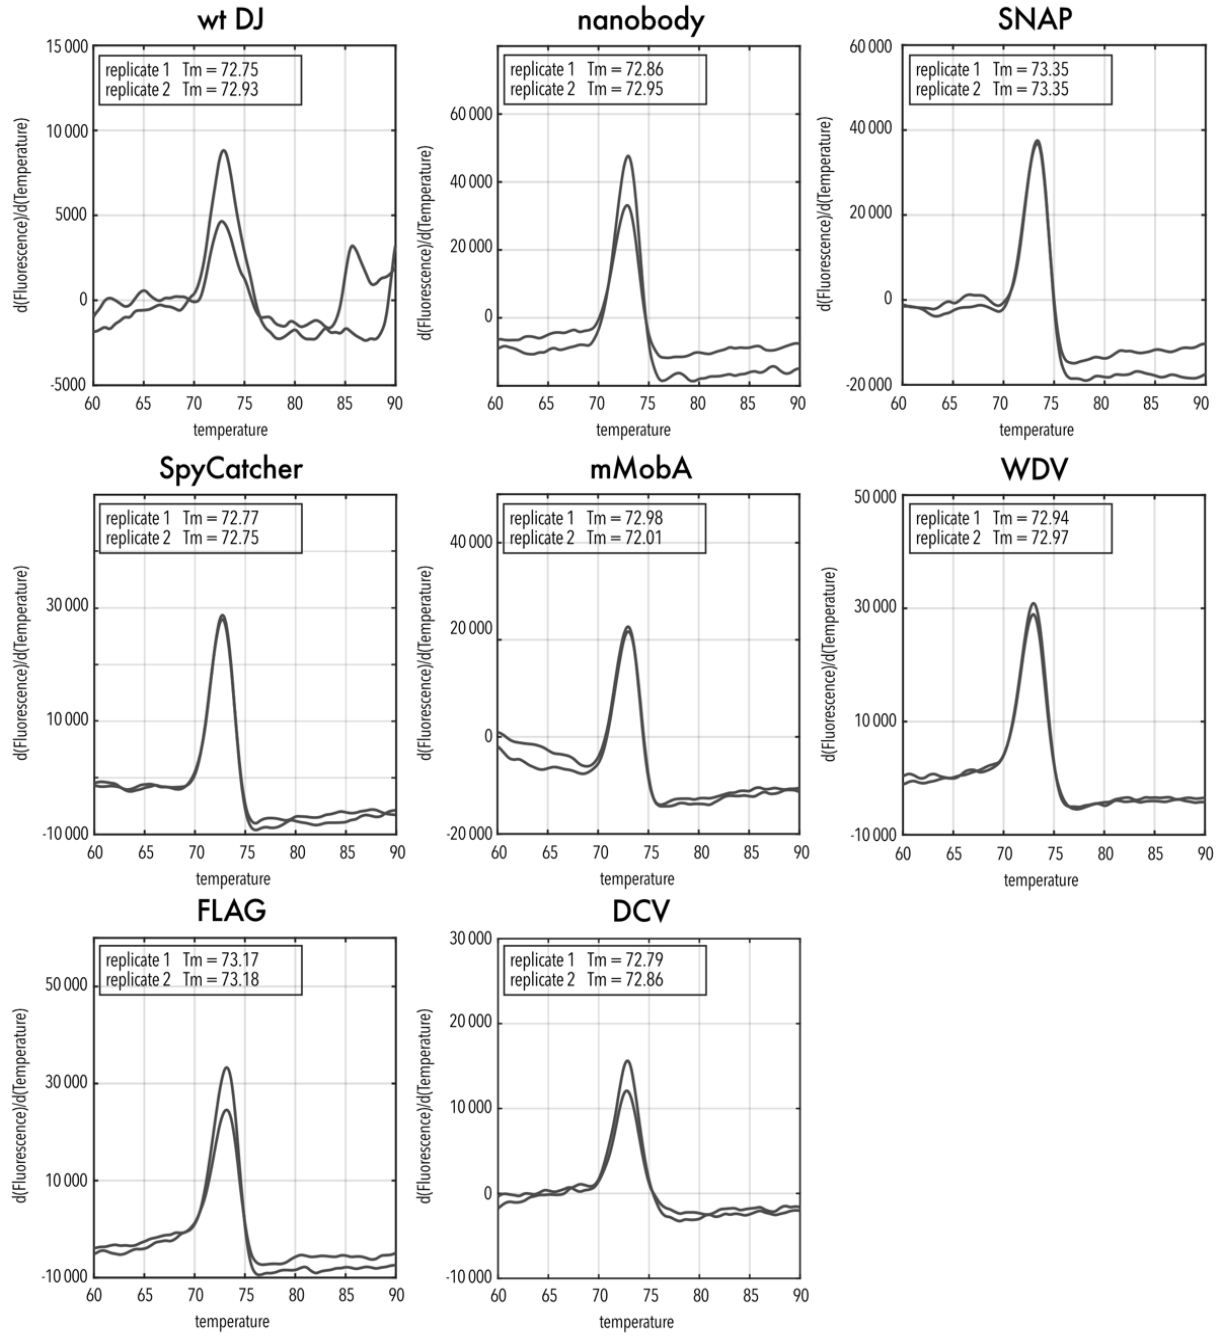

**Figure S6**

Thermal profiles of AAV domain insertion libraries. Data of two replicates are shown as " $\partial(\text{Fluorescence})/\partial(\text{Temperature})$ " versus Temperature in °C.

**A**

| sample   | full | empty | undecided | total | % full |
|----------|------|-------|-----------|-------|--------|
| wt DJ    | 309  | 17    | 18        | 344   | 89.8   |
| nanobody | 508  | 48    | 26        | 582   | 87.3   |
| SNAP     | 377  | 50    | 40        | 467   | 80.7   |

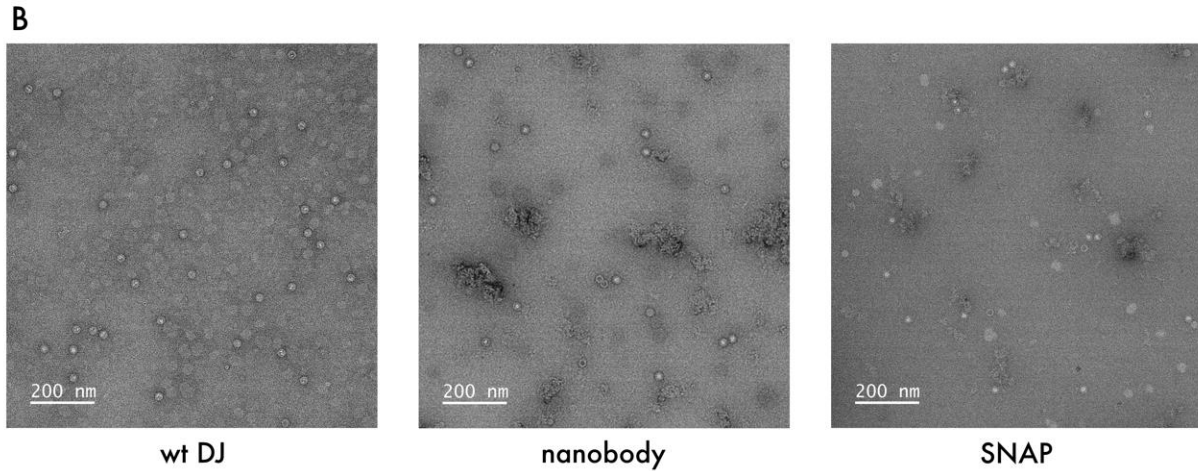

**Figure S7**

Quantification of empty to full capsid ratio by negative staining transmission electron microscopy. (A) More than 300 capsids were counted manually and grouped into full, empty, and undecided and the percentage of full capsids was calculated. (B) Representative transmission electron microscopy images of the indicated samples.

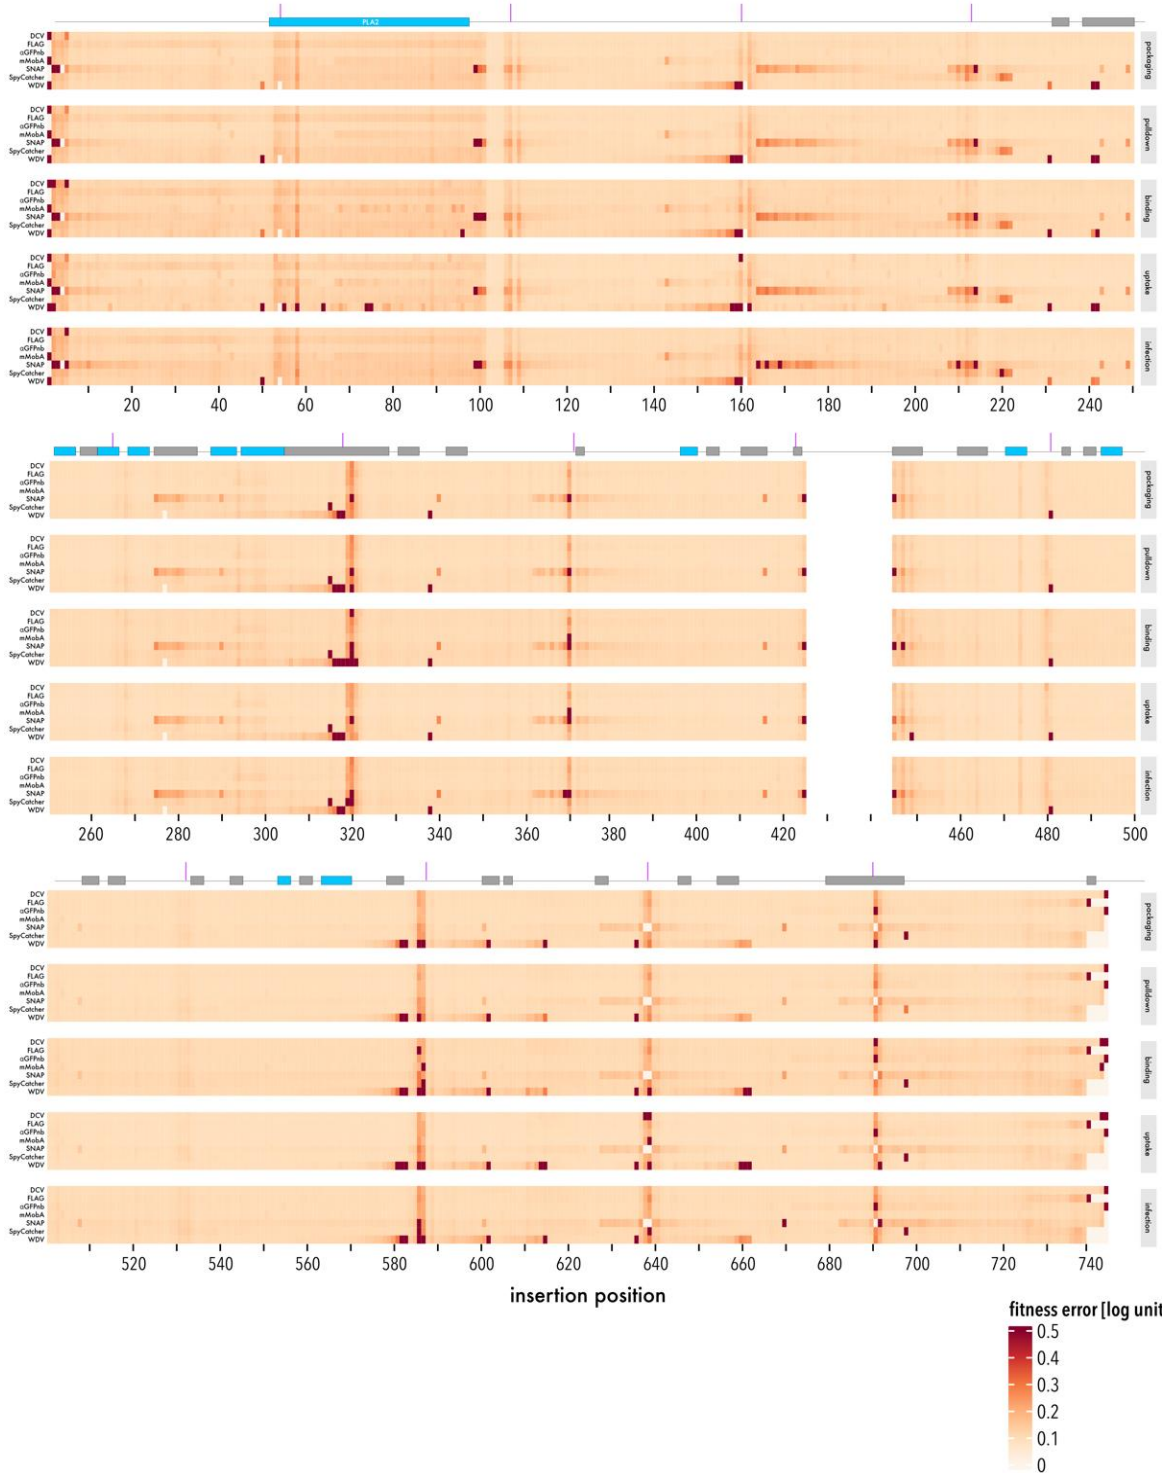

**Figure S8**

Accuracy of domain insertional profiling data. Standard errors of AAV fitness of all seven domain insertion libraries by insertion position and fitness assay. Secondary structure elements and VR1-9 of the capsid are indicated on top. Boundaries of oligos from VP1 assembly using SPINE are indicated by purple vertical bars.

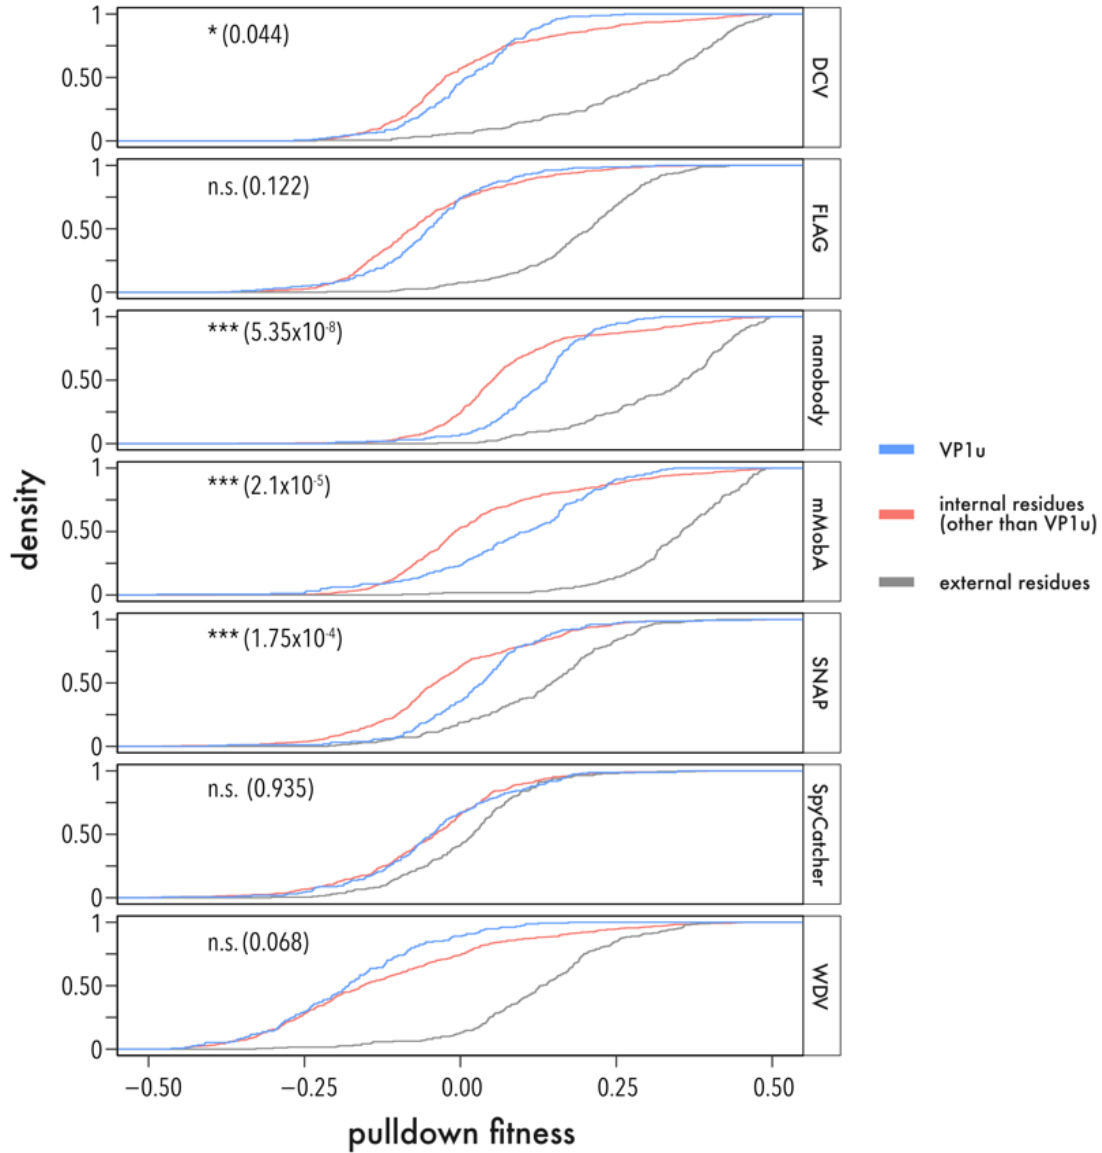

**Figure S9**

Distribution of pulldown fitness by residue location. Cumulative density function of pulldown fitness for each inserted motif stratified by residue location; within VP1u (blue), buried or exposed inside the capsid and not in VP1u (red), external residues (gray). Significance of distribution differences was tested using a two-sided, two-sample Kolmogorov-Smirnov test. Significance level and p values are shown.



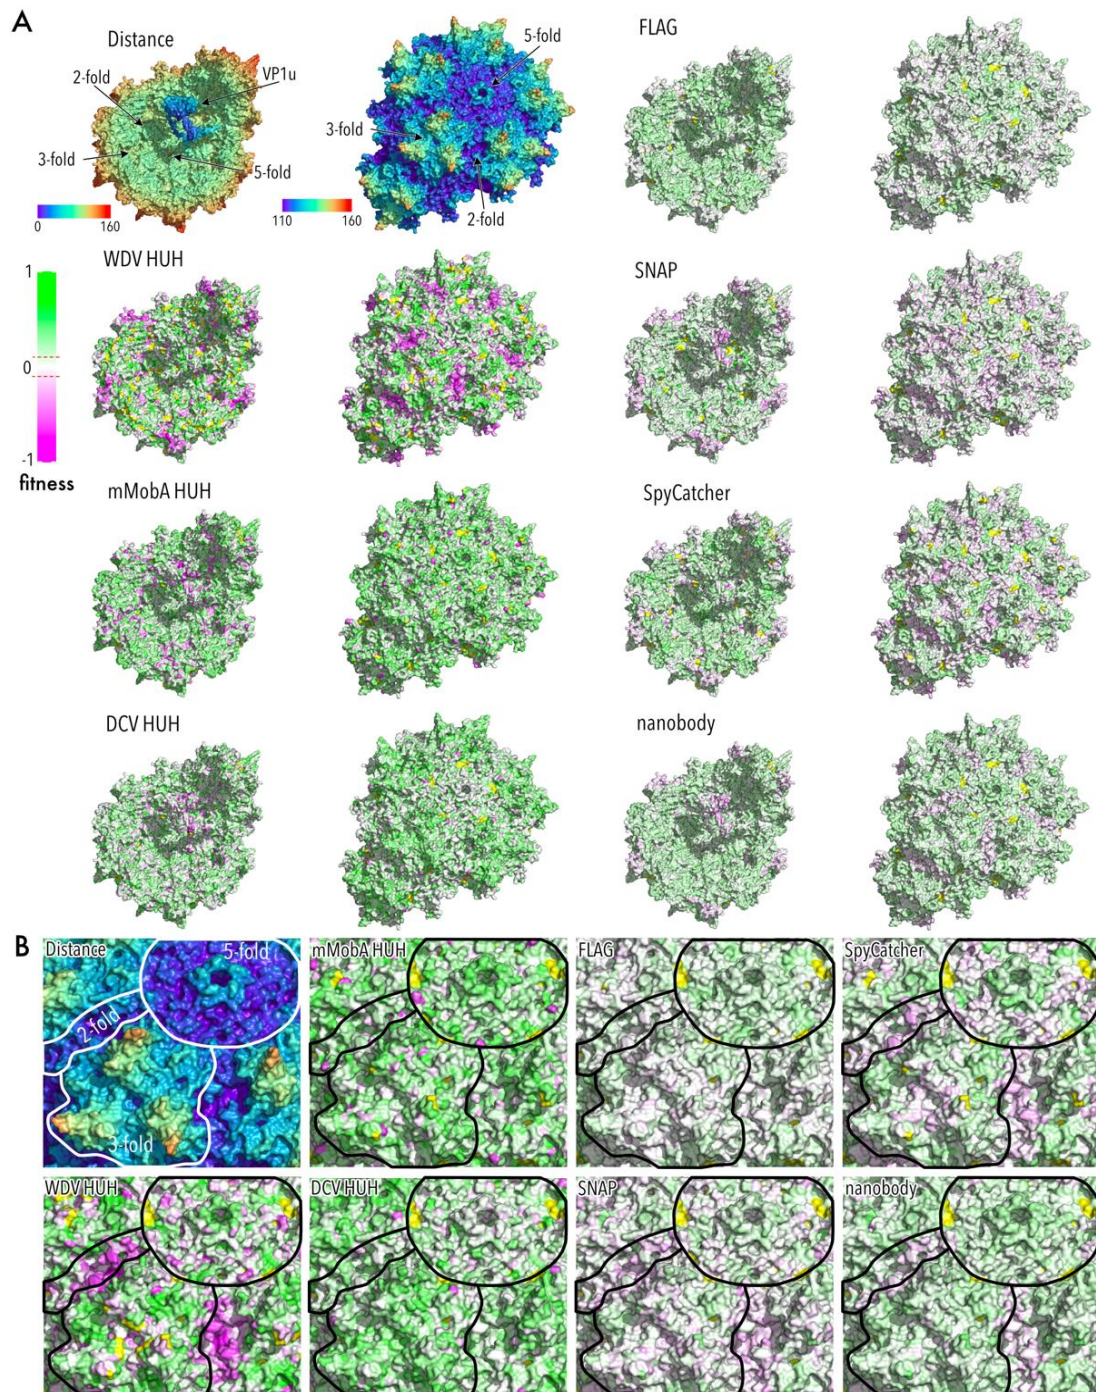

**Figure S10**

Binding fitness of AAV domain insertion libraries mapped to the capsid structure. (A) Top left corner: AAV-DJ capsid structure view from the inside (left) and outside (right) radially color-cued. 2-, 3-, and 5-fold axes are indicated. VP1u domain was modeled using RoseTTAFold (98) and manually positioned. All other structures show binding fitness heatmaps of the indicated domain insertions. Green indicates higher and magenta lower fitness than AAV-DJ (white) (RCSB PDB 7KFR). (B) Zoom of the outside structures from (A). 2-, 3-, and 5-fold axes are outlined.



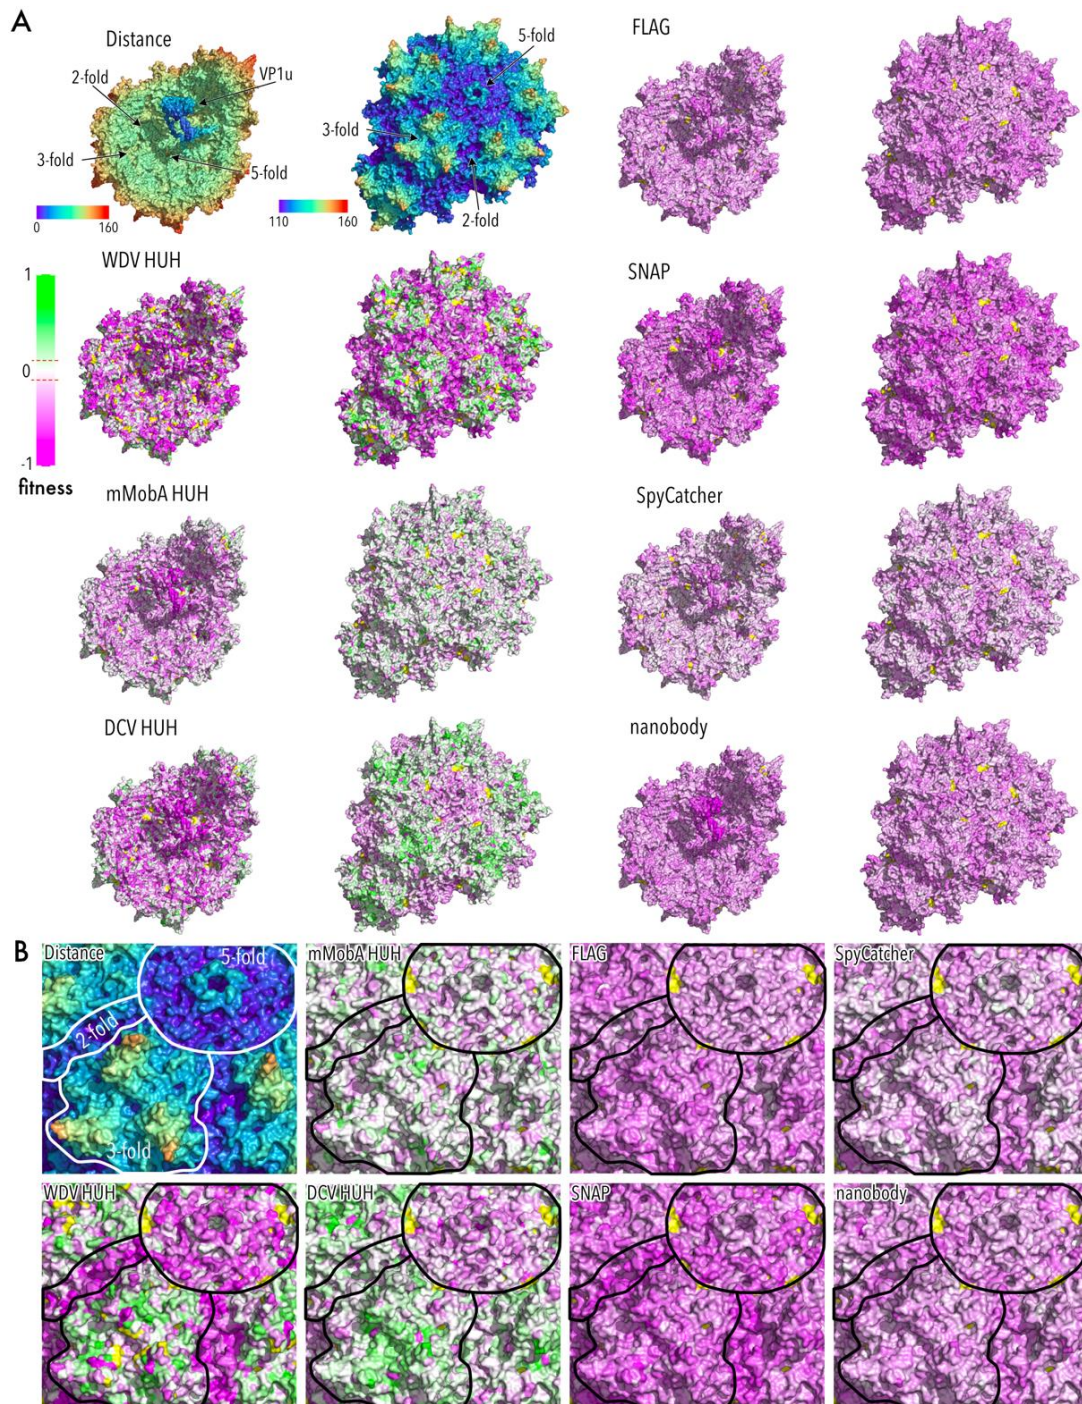

**Figure S11**

Uptake fitness of AAV domain insertion libraries mapped to the capsid structure. (A) Top left corner: AAV-DJ capsid structure view from the inside (left) and outside (right) radially color-cued. 2-, 3-, and 5-fold axes are indicated. VP1u domain was modeled using RoseTTAFold (98) and manually positioned. All other structures show uptake fitness heatmaps of the indicated domain insertions. Green indicates higher and magenta lower fitness than AAV-DJ (white) (RCSB PDB 7KFR). (B) Zoom of the outside structures from (A). 2-, 3-, and 5-fold axes are outlined.

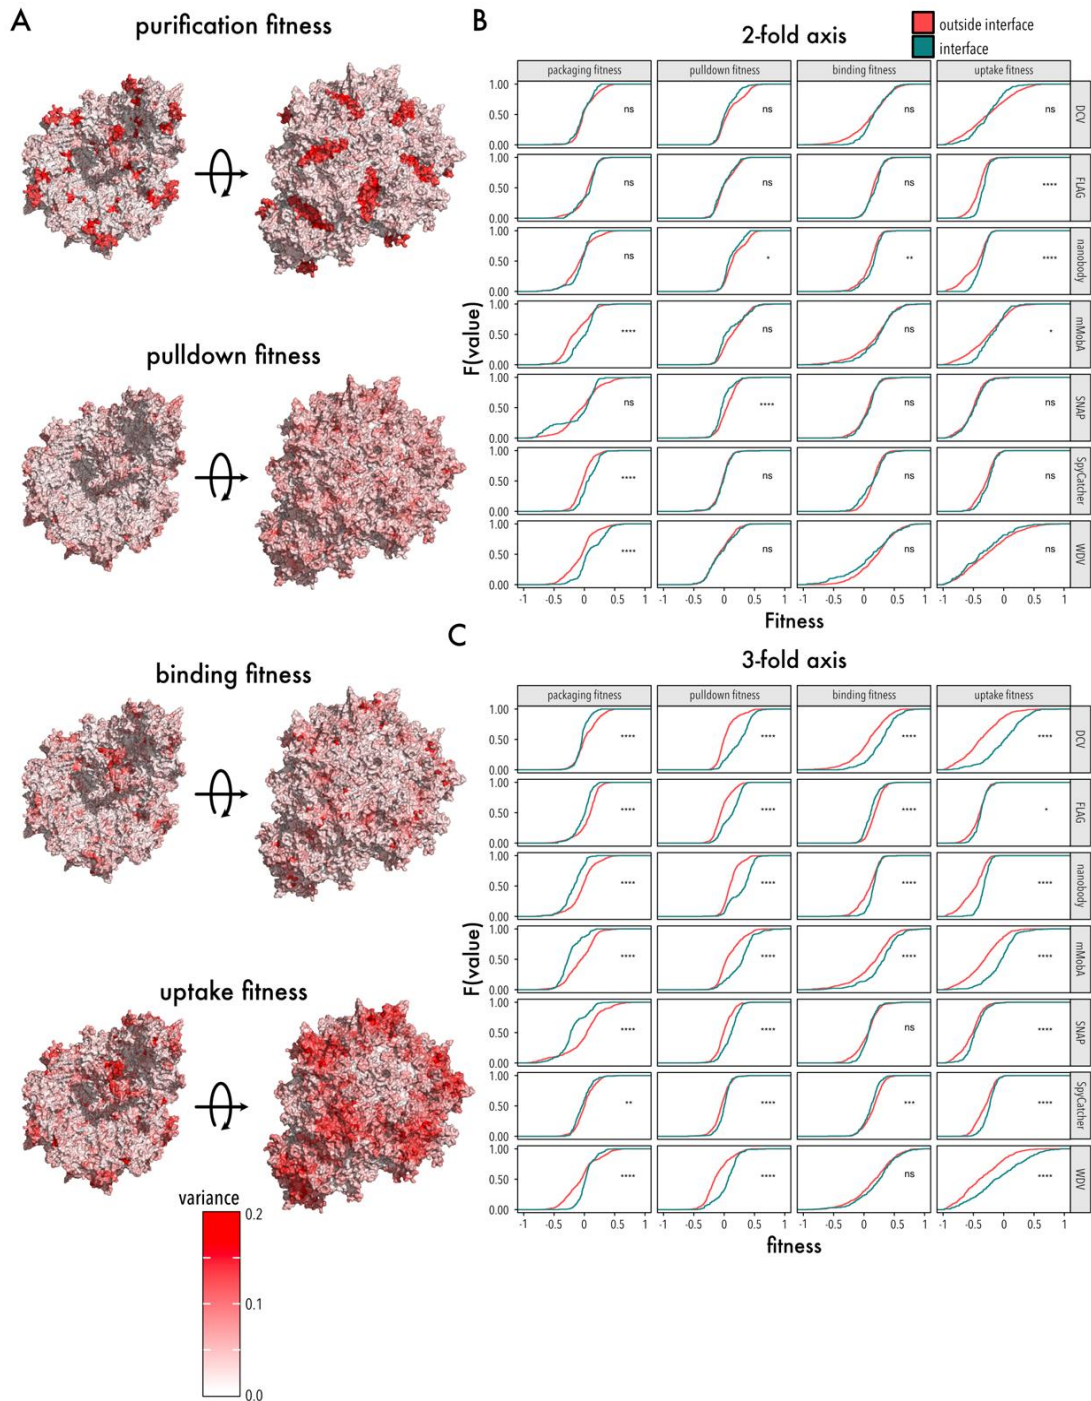

**Figure S12**

Variance of all measured fitness assays. (A) Variance of different fitness measures from all domain insertion libraries mapped to the AAV capsid structure. The capsid inside (left) and the capsid outside (right) are shown (RCSB PDB 7KFR). (B) Empirical cumulative density insertional fitness of residues within (petrol green) and outside (red) at the 2-fold axis (top) and 3-fold axis (bottom). Significance of distribution differences was tested using a two-sided, two-sample Kolmogorov-Smirnov test. Significance levels are shown (\*\*\*\* < 0.0001, \*\*\* < 0.001, \*\* < 0.01, \* < 0.05).



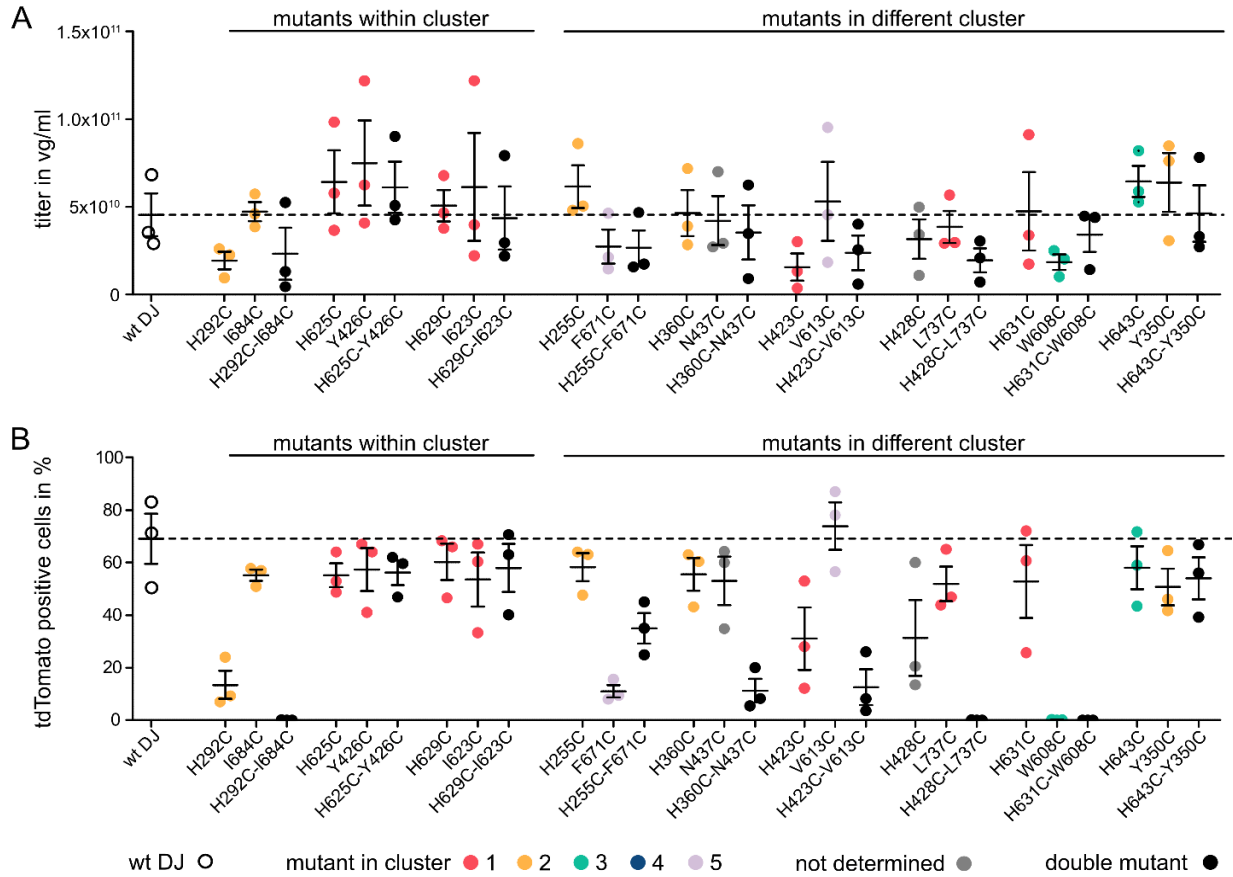

**Figure S13**

Packaging and infection fitness of cysteine mutants. (A) Crude lysate packaging titers quantified via qPCR. (B) Infection fitness quantified by measuring the percentage of tdTomato positive cells 48 hours post transduction with an MOI of  $1 \times 10^4$  vg/cell. Data are means  $\pm$  SEM. Data points of single mutants are colored by cluster membership, missing residues are gray, double mutants are black, and wildtype AAV-DJ fitness is shown as open circles and horizontal dashed line.



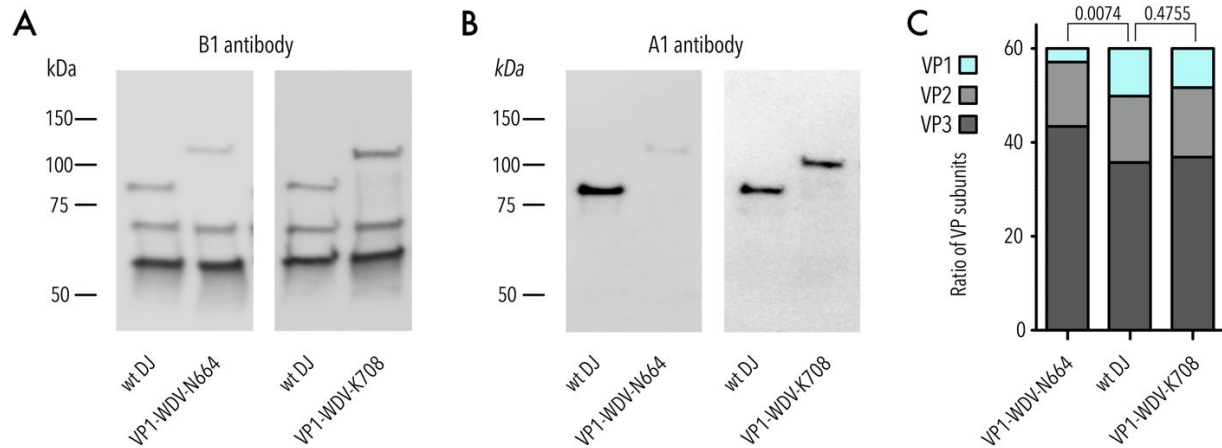

**Figure S14**

Quantification of VP ratios of WDV insertion variants N664 and K708. (A) Representative Western blot image of AAV domain insertion libraries stained with B1 antibody (detecting VP1, VP2 and VP3 subunits). (B) Representative Western blot image of AAV domain insertion libraries stained with A1 antibody (detecting VP1 subunits). (C) Western blot quantification of VP1, VP2, and VP3 subunits. Data are means (n=3). VP1 content varies significantly (one-way ANOVA p-value: 0.00993, Dunnett's test for pairwise comparison with wildtype AAV-DJ as control: N664 p-value 0.0074; K708 p-value 0.4755).

**Table S1**

Plasmids and libraries used in this study.

| <b>Plasmids not generated, but used for this study</b> |                |                                                                                                      |                                  |
|--------------------------------------------------------|----------------|------------------------------------------------------------------------------------------------------|----------------------------------|
| #                                                      | Name           | Encodes/ Use                                                                                         | Origin                           |
| 01                                                     | Adeno-helper   | Adeno-helper proteins for AAV productions                                                            | Cellbiolabs                      |
| 02                                                     | AAV-DJ         | rep2-capDJ for packaging of AAV-DJ                                                                   | Cellbiolabs                      |
| 03                                                     | tdTomato       | ITR_CAG-tdTomato-WPRE                                                                                | based on Addgene Plasmid #105554 |
| 04                                                     | DJ-M1K         | rep2-capDJ mutated VP1 start codon                                                                   | Schmidt Lab (Alina Zdechlik)     |
| 05                                                     | DJ-VP1         | DJ VP1 only (mutated start sites for VP2 & VP3), HA tag instead of HBD; used as cloning intermediate | Schmidt Lab (Alina Zdechlik)     |
| 06                                                     | CMV-GFP-GPI    | Expression of GFP at outer cell membrane                                                             | Schmidt Lab (Alina Zdechlik)     |
| 07                                                     | pUC19          | Stuffer plasmid                                                                                      | ThermoFisher                     |
|                                                        |                |                                                                                                      |                                  |
| <b>Plasmids and libraries generated for this study</b> |                |                                                                                                      |                                  |
| #                                                      | Name           | Use                                                                                                  | Origin                           |
| 08                                                     | library_entry  | ITR_EFS-driven miRFP670nano & p40 with BsmBI sites to insert DJ-VP1 chlor; used control plasmid      | Schmidt Lab (Mareike Hoffmann)   |
| 09                                                     | DJ-VP1_SilMut  | ITR_EFS-driven miRFP670nano & p40-driven DJ-VP1 with silent mutations                                | Schmidt Lab (Mareike Hoffmann)   |
| 10                                                     | DJ-H255C       | rep2-capDJ-H255C; cysteine mutant                                                                    | Schmidt Lab (Mareike Hoffmann)   |
| 11                                                     | DJ-F671C       | rep2-capDJ-F671C; cysteine mutant                                                                    | Schmidt Lab (Mareike Hoffmann)   |
| 12                                                     | DJ-H255C-F671C | rep2-capDJ-H255C-F671C; cysteine mutant                                                              | Schmidt Lab (Mareike Hoffmann)   |
| 13                                                     | DJ-H292C       | rep2-capDJ-H292C; cysteine mutant                                                                    | Schmidt Lab (Mareike Hoffmann)   |
| 14                                                     | DJ-I684C       | rep2-capDJ-I684C; cysteine mutant                                                                    | Schmidt Lab (Mareike Hoffmann)   |
| 15                                                     | DJ-H292C-I684C | rep2-capDJ-H292C-I684C; cysteine mutant                                                              | Schmidt Lab (Mareike Hoffmann)   |
| 16                                                     | DJ-H360C       | rep2-capDJ-H360C; cysteine mutant                                                                    | Schmidt Lab (Mareike Hoffmann)   |
| 17                                                     | DJ-N437C       | rep2-capDJ-N437C; cysteine mutant                                                                    | Schmidt Lab (Mareike Hoffmann)   |
| 18                                                     | DJ-H360C-N437C | rep2-capDJ-H360C-N437C; cysteine mutant                                                              | Schmidt Lab (Mareike Hoffmann)   |
| 19                                                     | DJ-H423C       | rep2-capDJ-H423C; cysteine mutant                                                                    | Schmidt Lab (Mareike Hoffmann)   |
| 20                                                     | DJ-V613C       | rep2-capDJ-V613C; cysteine mutant                                                                    | Schmidt Lab (Mareike Hoffmann)   |
| 21                                                     | DJ-H423C-V613C | rep2-capDJ-H423C-V613C; cysteine mutant                                                              | Schmidt Lab (Mareike Hoffmann)   |
| 22                                                     | DJ-H428C       | rep2-capDJ-H428C; cysteine mutant                                                                    | Schmidt Lab (Mareike Hoffmann)   |
| 23                                                     | DJ-L737C       | rep2-capDJ-L737C; cysteine mutant                                                                    | Schmidt Lab (Mareike Hoffmann)   |
| 24                                                     | DJ-H428C-L737C | rep2-capDJ-H428C-L737C; cysteine mutant                                                              | Schmidt Lab (Mareike Hoffmann)   |
| 25                                                     | DJ-H625C       | rep2-capDJ-H625C; cysteine mutant                                                                    | Schmidt Lab (Mareike Hoffmann)   |
| 26                                                     | DJ-Y426C       | rep2-capDJ-Y426C; cysteine mutant                                                                    | Schmidt Lab (Mareike Hoffmann)   |
| 27                                                     | DJ-H625C-Y426C | rep2-capDJ-H625C-Y426C; cysteine mutant                                                              | Schmidt Lab (Mareike Hoffmann)   |

|       |                        |                                                                             |                                |
|-------|------------------------|-----------------------------------------------------------------------------|--------------------------------|
| 28    | DJ-H629C               | rep2-capDJ-H629C; cysteine mutant                                           | Schmidt Lab (Mareike Hoffmann) |
| 29    | DJ-I623C               | rep2-capDJ-I623C; cysteine mutant                                           | Schmidt Lab (Mareike Hoffmann) |
| 30    | DJ-H629C-I623C         | rep2-capDJ-H629C-I623C; cysteine mutant                                     | Schmidt Lab (Mareike Hoffmann) |
| 31    | DJ-H631C               | rep2-capDJ-H631C; cysteine mutant                                           | Schmidt Lab (Mareike Hoffmann) |
| 32    | DJ-W608C               | rep2-capDJ-W608C; cysteine mutant                                           | Schmidt Lab (Mareike Hoffmann) |
| 33    | DJ-H631C-W608C         | rep2-capDJ-H631C-W608C; cysteine mutant                                     | Schmidt Lab (Mareike Hoffmann) |
| 34    | DJ-H643C               | rep2-capDJ-H643C; cysteine mutant                                           | Schmidt Lab (Mareike Hoffmann) |
| 35    | DJ-Y350C               | rep2-capDJ-Y350C; cysteine mutant                                           | Schmidt Lab (Mareike Hoffmann) |
| 36    | DJ-H643C-Y350C         | rep2-capDJ-H643C-Y350C; cysteine mutant                                     | Schmidt Lab (Mareike Hoffmann) |
| 37    | DJ-VP1-L256-WDV        | p40-driven DJ-VP1 with WDV insertion L256                                   | Schmidt Lab (Mareike Hoffmann) |
| 38    | DJ-VP1-S268-WDV        | p40-driven DJ-VP1 with WDV insertion S268                                   | Schmidt Lab (Mareike Hoffmann) |
| 39    | DJ-VP1-K311-WDV        | p40-driven DJ-VP1 with WDV insertion K311                                   | Schmidt Lab (Mareike Hoffmann) |
| 40    | DJ-VP1-T331-WDV        | p40-driven DJ-VP1 with WDV insertion T331                                   | Schmidt Lab (Mareike Hoffmann) |
| 41    | DJ-VP1-E349-WDV        | p40-driven DJ-VP1 with WDV insertion E349                                   | Schmidt Lab (Mareike Hoffmann) |
| 42    | DJ-VP1-T414-WDV        | p40-driven DJ-VP1 with WDV insertion T414                                   | Schmidt Lab (Mareike Hoffmann) |
| 43    | DJ-VP1-S244-WDV        | p40-driven DJ-VP1 with WDV insertion S244                                   | Schmidt Lab (Mareike Hoffmann) |
| 44    | DJ-VP1-N664-WDV        | p40-driven DJ-VP1 with WDV insertion N664                                   | Schmidt Lab (Mareike Hoffmann) |
| 45    | DJ-VP1-Y702-WDV        | p40-driven DJ-VP1 with WDV insertion Y702                                   | Schmidt Lab (Mareike Hoffmann) |
| 46    | DJ-VP1-K708-WDV        | p40-driven DJ-VP1 with WDV insertion K708                                   | Schmidt Lab (Mareike Hoffmann) |
| lib01 | DJ-VP1 chlor           | Template for domain insertion library, contains handle with chloramphenicol | Schmidt Lab (Mareike Hoffmann) |
| lib02 | pAAV_DJ-VP1-chlor      | ITR_EFS-driven miRFP670nano & p40-driven DJ-VP1 with chlor handle           | Schmidt Lab (Mareike Hoffmann) |
| lib03 | pAAV_DJ-VP1-nanobody   | ITR_EFS-driven miRFP670nano & p40-driven DJ-VP1 with nanobody insertion     | Schmidt Lab (Mareike Hoffmann) |
| lib04 | pAAV_DJ-VP1-SNAP       | ITR_EFS-driven miRFP670nano & p40-driven DJ-VP1 with SNAP insertion         | Schmidt Lab (Mareike Hoffmann) |
| lib05 | pAAV_DJ-VP1-SpyCatcher | ITR_EFS-driven miRFP670nano & p40-driven DJ-VP1 with SpyCatcher insertion   | Schmidt Lab (Mareike Hoffmann) |
| lib06 | pAAV_DJ-VP1-mMobA      | ITR_EFS-driven miRFP670nano & p40-driven DJ-VP1 with mMobA insertion        | Schmidt Lab (Mareike Hoffmann) |
| lib07 | pAAV_DJ-VP1-WDV        | ITR_EFS-driven miRFP670nano & p40-driven DJ-VP1 with WDV insertion          | Schmidt Lab (Mareike Hoffmann) |
| lib08 | pAAV_DJ-VP1-FLAG       | ITR_EFS-driven miRFP670nano & p40-driven DJ-VP1 with FLAG insertion         | Schmidt Lab (Mareike Hoffmann) |
| lib09 | pAAV_DJ-VP1-DCV        | ITR_EFS-driven miRFP670nano & p40-driven DJ-VP1 with DCV insertion          | Schmidt Lab (Mareike Hoffmann) |

**Table S2**  
Sequencing statistics.

| Sequencing Run      | Pool Name    | Assay             | Repl.      | Total Reads | Mean Quality R1 | Mean Quality R2 | Motif      | Aligned Reads | Pos | Median Reads / Position | Coverage [x-fold] |
|---------------------|--------------|-------------------|------------|-------------|-----------------|-----------------|------------|---------------|-----|-------------------------|-------------------|
| Schmidt_Project_053 | S1           | Insertion Library | 1          | 49,263,317  | 34.8            | 33.8            | DCV        | 984,082       | 744 | 1295                    | 1,323             |
|                     |              |                   |            |             |                 |                 | FLAG       | 440,403       |     | 564                     | 592               |
|                     |              |                   |            |             |                 |                 | GFPnb      | 612,028       |     | 768                     | 823               |
|                     |              |                   |            |             |                 |                 | mMobA      | 860,533       |     | 1187                    | 1,157             |
|                     |              |                   |            |             |                 |                 | SNAP       | 374,315       |     | 450                     | 503               |
|                     |              |                   |            |             |                 |                 | SpyCatcher | 387,705       |     | 503                     | 521               |
|                     |              |                   |            |             |                 |                 | WDV        | 663,006       |     | 849                     | 891               |
|                     | S2           | Packaging Assay   | 1          | 51,060,989  | 34.8            | 33.9            | DCV        | 866,748       | 744 | 996                     | 1,165             |
|                     |              |                   |            |             |                 |                 | FLAG       | 588,126       |     | 757                     | 790               |
|                     |              |                   |            |             |                 |                 | GFPnb      | 596,785       |     | 745                     | 802               |
|                     |              |                   |            |             |                 |                 | mMobA      | 972,338       |     | 1280                    | 1,307             |
|                     |              |                   |            |             |                 |                 | SNAP       | 355,788       |     | 448                     | 478               |
|                     |              |                   |            |             |                 |                 | SpyCatcher | 464,490       |     | 566                     | 624               |
|                     |              |                   |            |             |                 |                 | WDV        | 495,047       |     | 562                     | 665               |
|                     | S3           | Pulldown Assay    | 1          | 47,622,985  | 34.8            | 33.4            | DCV        | 1,103,510     | 744 | 1058                    | 1,483             |
|                     |              |                   |            |             |                 |                 | FLAG       | 479,651       |     | 557                     | 645               |
|                     |              |                   |            |             |                 |                 | GFPnb      | 773,476       |     | 934                     | 1,040             |
|                     |              |                   |            |             |                 |                 | mMobA      | 953,608       |     | 1099                    | 1,282             |
|                     |              |                   |            |             |                 |                 | SNAP       | 431,198       |     | 515                     | 580               |
|                     |              |                   |            |             |                 |                 | SpyCatcher | 1,664         |     | 2                       | 2                 |
|                     |              |                   |            |             |                 |                 | WDV        | 684,376       |     | 731                     | 920               |
|                     | S4           | Binding Assay     | 1          | 37,616,155  | 34.8            | 33.8            | DCV        | 1,753         | 744 | 1                       | 2                 |
|                     |              |                   |            |             |                 |                 | FLAG       | 544,918       |     | 598                     | 732               |
|                     |              |                   |            |             |                 |                 | GFPnb      | 562,553       |     | 611                     | 756               |
|                     |              |                   |            |             |                 |                 | mMobA      | 495,428       |     | 611                     | 666               |
|                     |              |                   |            |             |                 |                 | SNAP       | 311,261       |     | 355                     | 418               |
|                     |              |                   |            |             |                 |                 | SpyCatcher | 412,666       |     | 474                     | 555               |
|                     |              |                   |            |             |                 |                 | WDV        | 359,617       |     | 128                     | 483               |
| S5                  | Uptake Assay | 1                 | 47,345,415 | 34.7        | 33.4            | DCV             | 1,781      | 744           | 2   | 2                       |                   |
|                     |              |                   |            |             |                 | FLAG            | 308,480    |               | 360 | 415                     |                   |
|                     |              |                   |            |             |                 | GFPnb           | 235,074    |               | 257 | 316                     |                   |
|                     |              |                   |            |             |                 | mMobA           | 1,330,134  |               | 584 | 1,788                   |                   |
|                     |              |                   |            |             |                 | SNAP            | 289,337    |               | 300 | 389                     |                   |
|                     |              |                   |            |             |                 | SpyCatcher      | 728,389    |               | 832 | 979                     |                   |

|                     |    |                   |   |            |      |      |            |         |     |      |       |
|---------------------|----|-------------------|---|------------|------|------|------------|---------|-----|------|-------|
|                     |    |                   |   |            |      |      | WDV        | 490,064 |     | 516  | 659   |
|                     | S6 | Infectivity Assay | 1 | 43,873,293 | 34.8 | 33.6 | DCV        | 1,597   | 744 | 2    | 2     |
|                     |    |                   |   |            |      |      | FLAG       | 530,282 |     | 680  | 713   |
|                     |    |                   |   |            |      |      | GFPnb      | 685,511 |     | 762  | 921   |
|                     |    |                   |   |            |      |      | mMobA      | 556,769 |     | 527  | 748   |
|                     |    |                   |   |            |      |      | SNAP       | 248,758 |     | 169  | 334   |
|                     |    |                   |   |            |      |      | SpyCatcher | 383,865 |     | 424  | 516   |
|                     |    |                   |   |            |      |      | WDV        | 434,667 |     | 393  | 584   |
| Schmidt_Project_054 | S1 | Insertion Library | 1 | 51,407,231 | 35.1 | 34.7 | DCV        | 763,808 | 744 | 997  | 1,027 |
|                     |    |                   |   |            |      |      | FLAG       | 540,227 |     | 694  | 726   |
|                     |    |                   |   |            |      |      | GFPnb      | 800,432 |     | 1018 | 1,076 |
|                     |    |                   |   |            |      |      | mMobA      | 798,364 |     | 1115 | 1,073 |
|                     |    |                   |   |            |      |      | SNAP       | 386,969 |     | 490  | 520   |
|                     |    |                   |   |            |      |      | SpyCatcher | 429,433 |     | 555  | 577   |
|                     |    |                   |   |            |      |      | WDV        | 441,373 |     | 567  | 593   |
|                     | S2 | Packaging Assay   | 1 | 52,569,434 | 35.1 | 35.2 | DCV        | 792,792 | 744 | 1004 | 1,066 |
|                     |    |                   |   |            |      |      | FLAG       | 579,228 |     | 754  | 779   |
|                     |    |                   |   |            |      |      | GFPnb      | 753,802 |     | 945  | 1,013 |
|                     |    |                   |   |            |      |      | mMobA      | 731,258 |     | 982  | 983   |
|                     |    |                   |   |            |      |      | SNAP       | 360,936 |     | 456  | 485   |
|                     |    |                   |   |            |      |      | SpyCatcher | 439,536 |     | 580  | 591   |
|                     |    |                   |   |            |      |      | WDV        | 446,429 |     | 513  | 600   |
|                     | S3 | Pulldown Assay    | 1 | 55,102,309 | 35.2 | 34.8 | DCV        | 867,430 | 744 | 1033 | 1,166 |
|                     |    |                   |   |            |      |      | FLAG       | 584,332 |     | 704  | 785   |
|                     |    |                   |   |            |      |      | GFPnb      | 878,514 |     | 1068 | 1,181 |
|                     |    |                   |   |            |      |      | mMobA      | 831,938 |     | 1134 | 1,118 |
|                     |    |                   |   |            |      |      | SNAP       | 364,218 |     | 452  | 490   |
|                     |    |                   |   |            |      |      | SpyCatcher | 414,933 |     | 539  | 558   |
|                     |    |                   |   |            |      |      | WDV        | 421,941 |     | 450  | 567   |
|                     | S4 | Binding Assay     | 1 | 49,251,857 | 35.2 | 35   | DCV        | 634,851 | 744 | 769  | 853   |
|                     |    |                   |   |            |      |      | FLAG       | 451,741 |     | 602  | 607   |
|                     |    |                   |   |            |      |      | GFPnb      | 561,059 |     | 700  | 754   |
|                     |    |                   |   |            |      |      | mMobA      | 617,489 |     | 789  | 830   |
|                     |    |                   |   |            |      |      | SNAP       | 256,278 |     | 315  | 344   |
|                     |    |                   |   |            |      |      | SpyCatcher | 334,592 |     | 448  | 450   |
|                     |    |                   |   |            |      |      | WDV        | 367,036 |     | 400  | 493   |
|                     | S5 | Uptake Assay      | 1 | 54,099,860 | 35.2 | 35   | DCV        | 815,491 | 744 | 904  | 1,096 |
|                     |    |                   |   |            |      |      | FLAG       | 510,011 |     | 670  | 685   |
|                     |    |                   |   |            |      |      | GFPnb      | 630,885 |     | 774  | 848   |

|  |    |                   |   |            |      |      |            |         |     |      |       |
|--|----|-------------------|---|------------|------|------|------------|---------|-----|------|-------|
|  |    |                   |   |            |      |      | mMobA      | 780,744 |     | 1049 | 1,049 |
|  |    |                   |   |            |      |      | SNAP       | 284,480 |     | 336  | 382   |
|  |    |                   |   |            |      |      | SpyCatcher | 431,248 |     | 563  | 580   |
|  |    |                   |   |            |      |      | WDV        | 459,667 |     | 408  | 618   |
|  | S6 | Infectivity Assay | 1 | 47,910,960 | 35.1 | 34.6 | DCV        | 534,941 | 744 | 658  | 719   |
|  |    |                   |   |            |      |      | FLAG       | 414,577 |     | 555  | 557   |
|  |    |                   |   |            |      |      | GFPnb      | 421,517 |     | 507  | 567   |
|  |    |                   |   |            |      |      | mMobA      | 466,958 |     | 622  | 628   |
|  |    |                   |   |            |      |      | SNAP       | 179,921 |     | 215  | 242   |
|  |    |                   |   |            |      |      | SpyCatcher | 249,392 |     | 332  | 335   |
|  |    |                   |   |            |      |      | WDV        | 318,616 |     | 350  | 428   |

**Table S3**

DNA oligos used in this study.

| Use/ Target                                                 | Direction | Sequence                                   | Modification                  |
|-------------------------------------------------------------|-----------|--------------------------------------------|-------------------------------|
| qPCR/ p40 <sup>20</sup>                                     | forward   | TTTCCGGTGGGCAAAGG                          |                               |
|                                                             | reverse   | GCTCACTTATATCTGCGTCACT                     |                               |
| qPCR/ CMV-enhancer <sup>21</sup>                            | forward   | AACGCCAATAGGGACTTTCC                       |                               |
|                                                             | reverse   | GGGCGTACTTGGCATATGAT                       |                               |
| NGS amplification PCR / cap                                 | forward   | CTGGTCAATGTGGATTTGGATGACTGC                |                               |
|                                                             | reverse   | GCAGACCAAAGTTCAACTGAAACGAATCAAC            |                               |
| Pulldown/mMobA <sup>22</sup>                                | -         | CCAGTTTCTCGAAGAGAAACCGGTAAGTGCAC<br>CCTCCC | 3' Biotin                     |
| Pulldown/WDV <sup>23</sup>                                  | -         | TAATATTACCGGATGCCGCGC                      | 3' Biotin                     |
| Pulldown/DCV <sup>23</sup>                                  | -         | TATTATTACCAGAAATGATGA                      | 3' Biotin                     |
| Binding, Internalization, and Infectivity/WDV <sup>23</sup> | -         | TAATATTACCGGATGCCGCGC                      | 3' Amino<br>Modifier C6<br>dT |

## Supplemental References

1. Girod, A., Wobus, C. E., Zádori, Z., Ried, M., Leike, K., Tijssen, P., Kleinschmidt, J. A., and Hallek, M. (2002). The VP1 capsid protein of adeno-associated virus type 2 is carrying a phospholipase A2 domain required for virus infectivity. *J Gen Virol* *83*, 973-978.
2. Zádori, Z., Szelei, J., Lacoste, M. C., Li, Y., Gariépy, S., Raymond, P., Allaire, M., Nabi, I. R., and Tijssen, P. (2001). A viral phospholipase A2 is required for parvovirus infectivity. *Dev Cell* *1*, 291-302.
3. Venkatakrisnan, B., Yarbrough, J., Domsic, J., Bennett, A., Bothner, B., Kozyreva, O. G., Samulski, R. J., Muzyczka, N., McKenna, R., and Agbandje-McKenna, M. (2013). Structure and dynamics of adeno-associated virus serotype 1 VP1-unique N-terminal domain and its role in capsid trafficking. *J Virol* *87*, 4974-4984.
4. Grieger, J. C., Snowdy, S., and Samulski, R. J. (2006). Separate basic region motifs within the adeno-associated virus capsid proteins are essential for infectivity and assembly. *J Virol* *80*, 5199-5210.
5. Mateu, M. G. (2013). Assembly, stability and dynamics of virus capsids. *Arch Biochem Biophys* *531*, 65-79.
6. Medrano, M., Fuertes, M. Á., Valbuena, A., Carrillo, P. J., Rodríguez-Huete, A., and Mateu, M. G. (2016). Imaging and Quantitation of a Succession of Transient Intermediates Reveal the Reversible Self-Assembly Pathway of a Simple Icosahedral Virus Capsid. *J Am Chem Soc* *138*, 15385-15396.
7. Large, E. E., and Chapman, M. S. (2023). Adeno-associated virus receptor complexes and implications for adeno-associated virus immune neutralization. *Front Microbiol* *14*, 1116896.
8. Lerch, T. F., O'Donnell, J. K., Meyer, N. L., Xie, Q., Taylor, K. A., Stagg, S. M., and Chapman, M. S. (2012). Structure of AAV-DJ, a retargeted gene therapy vector: cryo-electron microscopy at 4.5 Å resolution. *Structure* *20*, 1310-1320.
9. Meyer, N. L., Hu, G., Davulcu, O., Xie, Q., Noble, A. J., Yoshioka, C., Gingerich, D. S., Trzynka, A., David, L., Stagg, S. M. et al. (2019). Structure of the gene therapy vector, adeno-associated virus with its cell receptor, AAVR. *Elife* *8*, e44707.
10. Pillay, S., Meyer, N. L., Puschnik, A. S., Davulcu, O., Diep, J., Ishikawa, Y., Jae, L. T., Wosen, J. E., Nagamine, C. M., Chapman, M. S. et al. (2016). An essential receptor for adeno-associated virus infection. *Nature* *530*, 108-112.
11. Stagg, S. M., Yoshioka, C., Davulcu, O., and Chapman, M. S. (2022). Cryo-electron Microscopy of Adeno-associated Virus. *Chem Rev* *122*, 14018-14054.
12. Xie, Q., Bu, W., Bhatia, S., Hare, J., Somasundaram, T., Azzi, A., and Chapman, M. S. (2002). The atomic structure of adeno-associated virus (AAV-2), a vector for human gene therapy. *Proc Natl Acad Sci U S A* *99*, 10405-10410.
13. Meyer, N. L., and Chapman, M. S. (2022). Adeno-associated virus (AAV) cell entry: structural insights. *Trends Microbiol* *30*, 432-451.
14. Horowitz, E. D., Finn, M. G., and Asokan, A. (2012). Tyrosine cross-linking reveals interfacial dynamics in adeno-associated viral capsids during infection. *ACS Chem Biol* *7*, 1059-1066.
15. Gerlach, B., Kleinschmidt, J. A., and Böttcher, B. (2011). Conformational changes in adeno-associated virus type 1 induced by genome packaging. *J Mol Biol* *409*, 427-438.



16. Levy, H. C., Bowman, V. D., Govindasamy, L., McKenna, R., Nash, K., Warrington, K., Chen, W., Muzyczka, N., Yan, X., Baker, T. S. et al. (2009). Heparin binding induces conformational changes in Adeno-associated virus serotype 2. *J Struct Biol* *165*, 146-156.
17. DiPrimio, N., Asokan, A., Govindasamy, L., Agbandje-McKenna, M., and Samulski, R. J. (2008). Surface loop dynamics in adeno-associated virus capsid assembly. *J Virol* *82*, 5178-5189.
18. Bleker, S., Pawlita, M., and Kleinschmidt, J. A. (2006). Impact of capsid conformation and Rep-capsid interactions on adeno-associated virus type 2 genome packaging. *J Virol* *80*, 810-820.
19. Drouin, L. M., Lins, B., Janssen, M., Bennett, A., Chipman, P., McKenna, R., Chen, W., Muzyczka, N., Cardone, G., Baker, T. S. et al. (2016). Cryo-electron Microscopy Reconstruction and Stability Studies of the Wild Type and the R432A Variant of Adeno-associated Virus Type 2 Reveal that Capsid Structural Stability Is a Major Factor in Genome Packaging. *J Virol* *90*, 8542-8551.
20. Nonnenmacher, M., Wang, W., Child, M. A., Ren, X. Q., Huang, C., Ren, A. Z., Tocci, J., Chen, Q., Bittner, K., Tyson, K. et al. (2021). Rapid evolution of blood-brain-barrier-penetrating AAV capsids by RNA-driven biopanning. *Mol Ther Methods Clin Dev* *20*, 366-378.
21. Negrete, A., and Kotin, R. M. (2007). Production of recombinant adeno-associated vectors using two bioreactor configurations at different scales. *J Virol Methods* *145*, 155-161.
22. Lovendahl, K. N., Hayward, A. N., and Gordon, W. R. (2017). Sequence-Directed Covalent Protein-DNA Linkages in a Single Step Using HUH-Tags. *J Am Chem Soc* *139*, 7030-7035.
23. Tompkins, K. J., Houtti, M., Litzau, L. A., Aird, E. J., Everett, B. A., Nelson, A. T., Pornschloegl, L., Limón-Swanson, L. K., Evans, R. L., Evans, K. et al. (2021). Molecular underpinnings of ssDNA specificity by Rep HUH-endonucleases and implications for HUH-tag multiplexing and engineering. *Nucleic Acids Res* *49*, 1046-1064.
